# Supplementary material for: Rapid, in-field speciation of Cr(vi) in aqueous samples using photoluminescent MoS2 quantum dots and portable fluorimetry with digital image analysis
Source: Royal Society of Chemistry journal article supplement (doi:10.1039/d4ay00688g), 2024-01-01
Supplement: d4ay00688g1.pdf [file d4ay00688g1.pdf]

## Rapid, In-Field Speciation of Cr(VI) in Aqueous Samples Using Photoluminescent MoS<sub>2</sub> Quantum Dots and Portable Fluorimetry with Digital Image Analysis

Leila Khoshmaram\*<sup>a</sup>, Mina Emami<sup>a</sup>, Roghayyeh Jalili<sup>b</sup>, Amin Imani-Nabiyyi\*<sup>c</sup>

<sup>a</sup> Department of Chemistry, Faculty of Sciences, Azarbaijan Shahid Madani University, Tabriz, Iran

<sup>b</sup> Department of Applied Chemistry, Faculty of Chemistry, University of Tabriz, Tabriz, Iran

<sup>c</sup> Faculty of Biosciences and Aquaculture, Nord University, Bodo, Norway

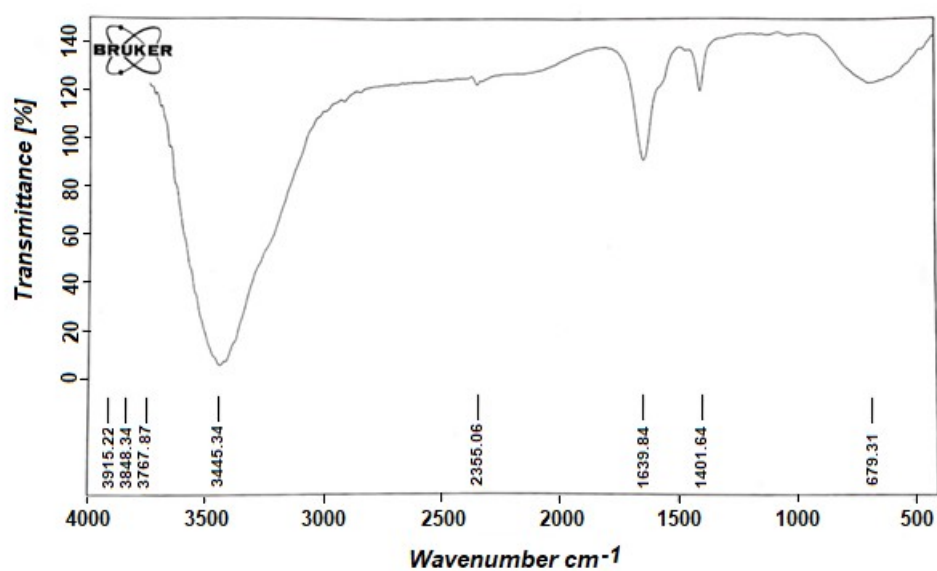

Fig. 1S. IR spectrum of MoS<sub>2</sub> QDs

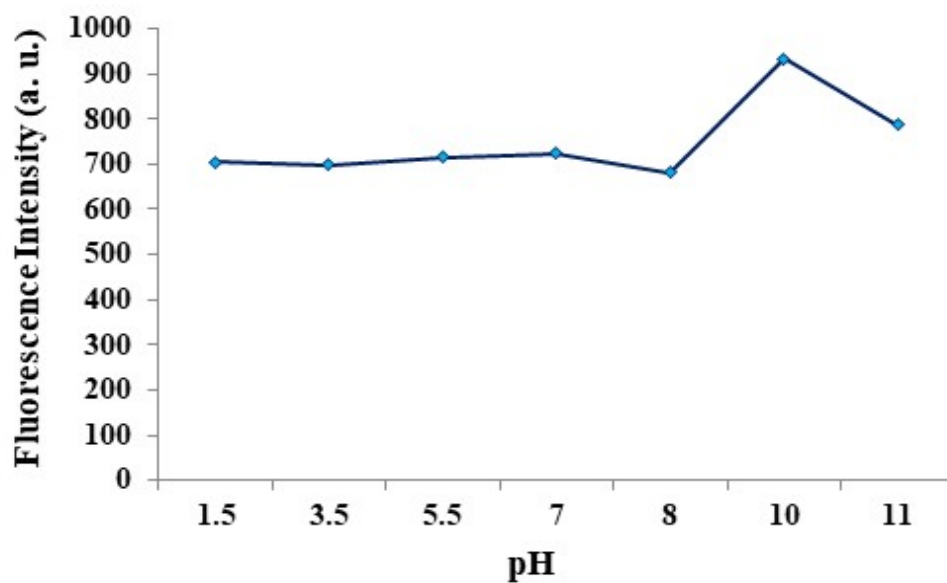

Fig. 2S. Effect of pH on MoS<sub>2</sub> QDs fluorescence intensity

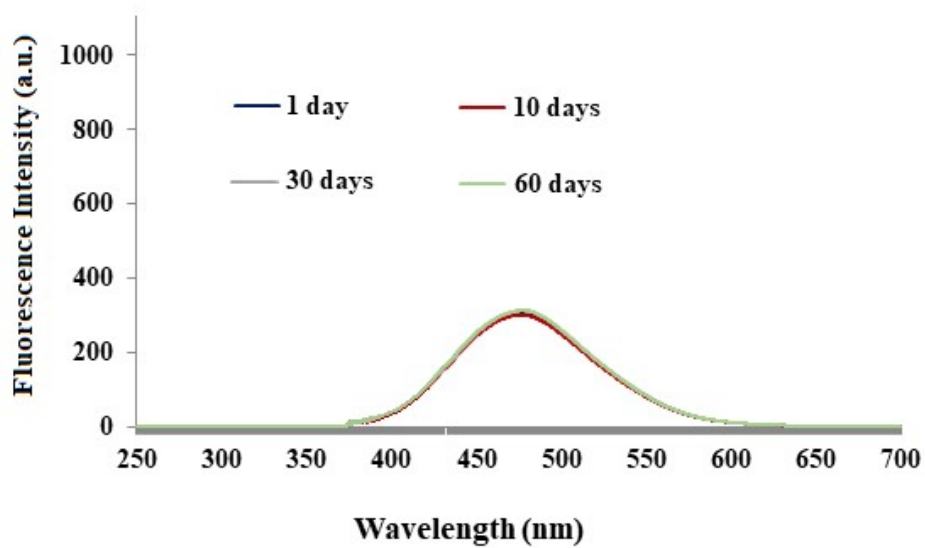

Fig. 3S. Fluorescence spectrum of MoS<sub>2</sub> QDs on different days

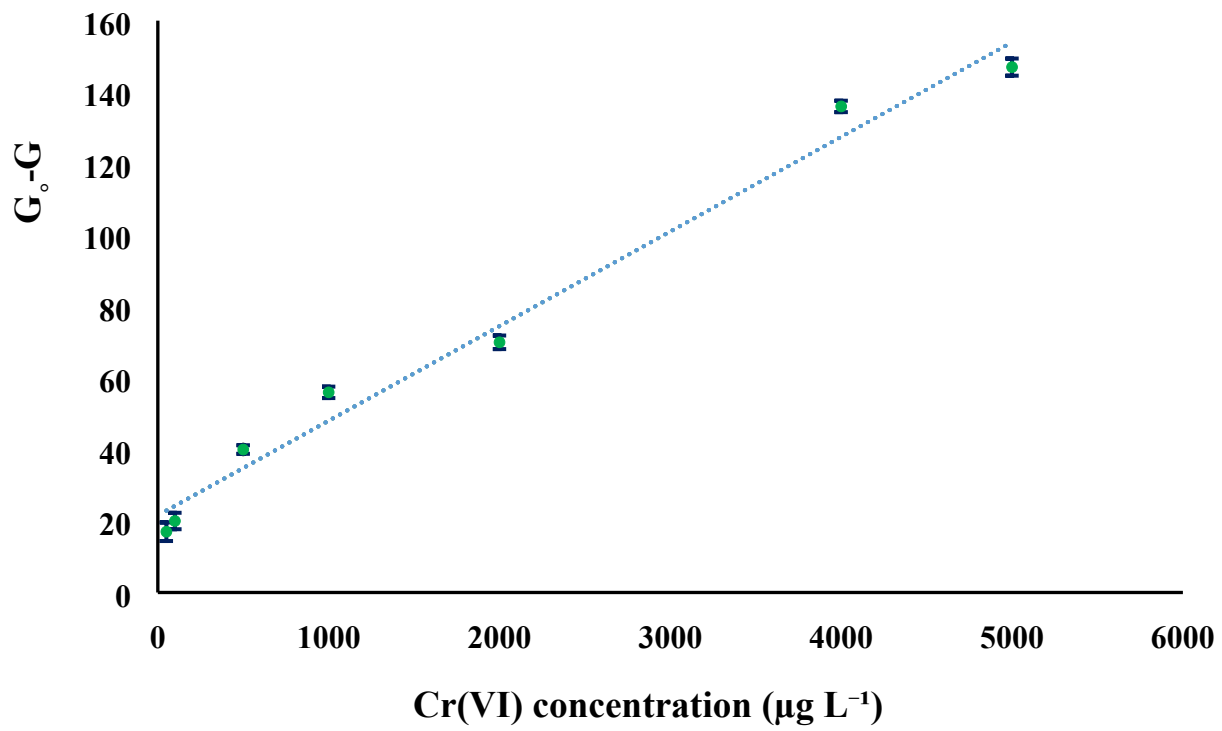

Fig. 4S. The calibration curves obtained by the proposed method based on the self-constructed fluorimeter.
